# Supplementary material
Source: Elsevier journal article supplement (https://www.sciencedirect.com/science/article/pii/S0213005X20302925)
Supplement: mmc1 [file S0213005X20302925:mmc1.pdf]

## **7. Anexos.**

### **Anexo 1: Hoja informativa para el donante de microbiota fecal**

#### **¿En qué consiste y para qué sirve la transferencia de microbiota fecal?**

La transferencia de microbiota fecal (TMF) es el término utilizado cuando se obtienen microorganismos intestinales de las heces de un individuo sano, y se introducen en el tracto gastrointestinal de otra persona con la finalidad de restaurar su microbiota intestinal dañada.

#### **¿Cómo han de ser los donantes?**

Los donantes de microbiota fecal han de ser personas sanas, y sin antecedentes personales ni familiares de enfermedades gastrointestinales. Los donantes no pueden tomar medicamentos que se excreten a través de las heces o que puedan alterar la microbiota intestinal normal.

#### **Descripción de la donación**

Como donante potencial le realizaran pruebas antes de la donación para asegurar que no presenta ningún tipo de enfermedad o infección potencialmente transmisible. Estas pruebas incluyen unos cuestionarios realizados por los responsables del programa de la transferencia de microbiota fecal, una analítica de sangre completa y un estudio de heces.

#### **¿Qué beneficios tiene la donación?**

La donación de heces es voluntaria y exenta de compensación económica.

#### **¿Qué riesgos tiene la donación?**

Los riesgos que puede presentar el paciente con la participación en el estudio son los derivados de la extracción de sangre, ya que el resto de procedimientos están libres de riesgos. Los riesgos asociados a una punción venosa son:

- Cualquier punción venosa supone un riesgo de infección aunque se realice en las condiciones de máxima asepsia.
- La punción venosa puede causar dolor en la zona del pinchazo o un hematoma.
- Algunas punciones provocan un proceso inflamatorio local (flebitis) que suele resolverse con tratamiento local pero que en algunas raras ocasiones puede desencadenar un proceso tromboembólico más grave.

#### **Compromiso del donante de microbiota fecal**

Si usted acepta ser donante de microbiota, desde el período de selección y durante todo el tiempo que usted desee seguir aportando muestras, debe comprometerse a notificar de forma inmediata al equipo responsable del programa de transferencia de microbiota fecal cualquiera de los siguientes supuestos:

- Ha estado diagnosticado de la COVID-19 (sospecha o certeza).
- Ha estado en contacto con alguien que presenta la COVID-19 (sospecha o certeza).
- Presenta alguno de los siguientes síntomas: fiebre, tos, dolor de cabeza, sensación de falta de aire, cansancio, diarrea, náuseas o vómitos, pérdida del gusto o del olfato y/o erupciones cutáneas. En caso de que presente otros síntomas de reciente aparición, también debe notificarlo.

1

- Ha tomado antibióticos, antivirales, antifúngicos o probióticos.
- Modificación en cualquier respuesta del cuestionario realizado en la entrevista personal inicial.

Durante la semana previa a la donación, recomendamos una serie de cambios dietéticos. Estos cambios incluyen:

- Evitar mariscos, langostinos, ostras, frutos secos y carnes procesadas como el salami, jamón o salchichas.
- En caso de que usted conozca al receptor, debe evitar consumir alimentos a los que el receptor es alérgico, y evitar también los alimentos que podrían provocar alergia al receptor (frutos secos, huevos, fresas...) durante los 7 días previos a la donación.
- Se recomienda realizar una dieta rica en fibra para mejorar la calidad de su microbiota intestinal: pan integral, vegetales, legumbres, un mínimo de 2 piezas de fruta al día y beber al menos 1 litro de agua al día.

### **Observaciones**

Una vez haya realizado la donación, si en los meses o años posteriores a la misma, se le diagnostica alguna enfermedad importante, por favor, póngase en contacto con los responsables de la Unidad de transferencia de microbiota fecal de su centro. De esta manera se podrá hacer un seguimiento específico de los receptores que hayan recibido un TMF a partir de una muestra fecal suya.

### **Confidencialidad y protección de datos personales**

El tratamiento, la comunicación y la cesión de los datos de carácter personal de todos los sujetos que entran en el programa de transferencia de microbiota fecal se ajustará a lo dispuesto en la ley Orgánica 3/2018, de 5 de diciembre de protección de datos de carácter personal y garantía de derechos digitales, así como el Reglamento (UE) 2016/679 del Parlamento Europeo y del consejo, de 27 de abril de 2016 de protección de datos, y en especial a la Ley 41/2002, de 14 de noviembre, básica reguladora de la autonomía del paciente y de derechos y obligaciones en materia de información y documentación clínica.

Asimismo, única y exclusivamente se tratarán los datos personales que sean necesarios para formar parte del programa de transferencia de microbiota fecal, que usted de manera voluntaria quiera, siendo esta la base jurídica del tratamiento.

El acceso a su información personal quedará restringida al médico del estudio/colaboradores y autoridades sanitarias, cuando lo precisen para comprobar los datos y procedimientos relativos al programa, pero siempre manteniendo la confidencialidad de acuerdo con la legislación vigente.

Sus datos como donantes se codificarán mediante un número que se asignará a cada donante en el momento de ser incluido en el programa de transferencia de microbiota fecal, y se conservarán durante 15 años, sin perjuicio de que los requerimientos de la donación obliguen a un tiempo de conservación superior.

De acuerdo con lo establecido en la legislación mencionada, usted podrá ejercer en cualquier momento los derechos de acceso, rectificación, supresión, limitación del tratamiento portabilidad y oposición y cancelación por el que deberá dirigirse al responsable del tratamiento de los datos.

2

No se prevén cesiones a terceros de sus datos personales sin consentimiento, a excepción de que alguna norma establezca la cesión de sus datos, y así sea necesario y/u obligatorio. En caso de transferencia de los datos, se mantendrá el mismo nivel de confidencialidad que la normativa española.

Asimismo sus datos podrán ser tratados con fines de investigación, de conformidad con la Ley 41/2002, de 14 de noviembre, básica reguladora de la autonomía del paciente y derechos y obligaciones en materia de información y documentación clínica, previo procedimiento de separación de sus datos asistenciales de las de carácter identificativo, que permitan su anonimato.
