# Supplementary material
Source: Elsevier journal article supplement (https://www.sciencedirect.com/science/article/pii/S0213005X20302925)
Supplement: mmc2 [file S0213005X20302925:mmc2.pdf]

## **Anexo 2: Cuestionario para el cribado del donante en la entrevista personal**

Una respuesta positiva a cualquiera de las preguntas del cuestionario, en general representará una exclusión del donante, aunque se actuará de forma individualizada en cada caso y según el tipo de respuesta.

1. Datos demográficos (sexo, peso, altura, raza, país nacimiento).
2. Hábitos tóxicos (alcohol, tabaco u otros tóxicos).
3. Antecedentes personales médicos con hincapié en enfermedad inflamatoria intestinal, obesidad, diabetes mellitus, atopia, síndrome de fatiga crónica, fibromialgia, enfermedades neurológicas, cirrosis hepática, alergias, tuberculosis (infección tuberculosa latente) o cáncer.
4. Antecedentes personales quirúrgicos. En caso afirmativo, indicar si se realizó en algún país en vías de desarrollo y/o con condiciones higiénicas deficientes.
5. Medicación habitual/espórica en los últimos 6 meses (especial hincapié en agentes antimicrobianos, inhibidores bomba protones).
6. Profesión. Valorar si está asociada a un elevado riesgo de enfermedades de transmisión sanguínea, de colonización por gérmenes multiresistentes o de enfermedades transmisibles (Ej.: trabajadores sanitarios, contacto con pacientes o presos, profesionales guardería, centros para personas mayores, etc).
7. ¿Presenta factores de riesgo para ser portador de gérmenes multiresistentes? (Ej.: Personas en contacto con el sistema sanitario: hospitalización reciente, ingreso reciente en centros de larga estancia, asistencia regular a hospitales de día y/o cirugía ambulatoria, etc).
8. ¿Ha estado ingresado en un centro penitenciario en alguna ocasión?
9. ¿Presenta conductas sexuales de riesgo? Ej.: relaciones sexuales en los últimos 12 meses con: múltiples parejas, con alguna persona portadora del VIH, alguna persona que cambia frecuentemente de pareja, alguna persona que se haya podido administrar drogas vía intravenosa, alguna persona que ejerza o haya ejercido la prostitución.
10. ¿Su pareja habitual presenta alguna enfermedad infecciosa?
11. ¿Usted ha presentado alguna enfermedad de transmisión sexual? (ej. Sífilis, gonorrea)

3

12. Antecedentes familiares relevantes, con especial hincapié en las enfermedades del aparato digestivo (pólipos, cáncer intestinal, enfermedad inflamatoria intestinal). En caso afirmativo, ¿qué familiar?

13. ¿Hay enfermedades hereditarias en su familia?

14. ¿Algún familiar presenta o ha presentado la enfermedad de Creutzfeldt-Jakob ("enfermedad de las vacas locas")?

15. ¿Cuál es su hábito deposicional habitual?

16. ¿Ha recibido en alguna ocasión tratamiento para una infección intestinal?

17. ¿Toma productos y/o medicación con la finalidad de modificar o influenciar su frecuencia deposicional?

18. ¿Presenta estreñimiento y/o diarrea durante más de una ocasión al mes?

19. ¿Presenta síntomas relacionados con las hemorroides?

20. ¿Presenta molestia/dolor abdominal a menudo?

21. ¿Ha objetivado sangre en las heces en alguna ocasión? En caso afirmativo, ¿se ha estudiado por este motivo?

22. ¿Ha presentado fiebre en las últimas 2 semanas?

23. ¿Ha presentado diarrea en las últimas 2 semanas (>3 deposiciones/día no formadas, o > 8 deposiciones en 48 horas)?

24. ¿Alguna persona de su entorno (hogar, trabajo...) presenta o ha presentado fiebre, diarrea u otra clínica digestiva en las últimas 2 semanas?

25. ¿Ha sido vacunado según el calendario de vacunación? ¿Ha recibido alguna vacuna atenuada y/o viva en los últimos 6 meses?

26. ¿Ha sufrido accidentes relacionados con sangre (Ej.: herida con aguja u objeto que contiene sangre de otra persona)?

27. ¿Ha sido rechazado para ser donante de sangre? En caso afirmativo indicar motivo.

28. ¿Ha recibido una transfusión de productos sanguíneos? En caso afirmativo indicar cuándo.

29. ¿Ha consumido drogas vía intravenosa o vía inhalada en alguna ocasión en los últimos 12 meses?

30. Historial de tatuajes, piercing y/o acupuntura. En caso afirmativo: cuándo, en qué país y si se empleó material estéril y de un solo uso.

31. ¿Ha recibido un trasplante capilar o de otro tejido (ej. córnea)?

32. ¿Ha estado en un país tropical en los últimos 6 meses? ¿Qué viajes ha realizado en los últimos 6 meses?

33. ¿Ha presentado alguna de las siguientes enfermedades: paludismo (malaria), enfermedad de Chagas, Leishmaniosis, Tripanosomiasis?

4

34. ¿Ha vivido en un país no europeo durante más de 5 años?

35. ¿Residió en el Reino Unido entre los años 1980 y 1996?

36. ¿Presenta o ha presentado síntomas típicos de la COVID-19 (fiebre, fatiga, tos seca, mialgias, disnea, cefalea, diarrea, anosmia, disgeusia y/o erupciones cutáneas) en las últimas 12 semanas?

¿Ha estado en contacto con alguien que haya presentado una infección (confirmada o sospecha) por SARS-CoV-2 en las últimas 4 semanas
